# Supplementary material
Source: Springer Nature journal article supplement (https://www.springermedizin.de/resource/supplementary/12998_2011_58_MOESM8_ESM.pdf/9680054)

L4/5

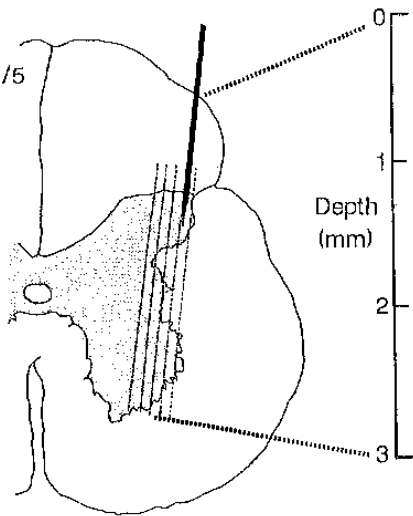

"s"

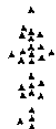

"d"

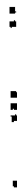

"sd"

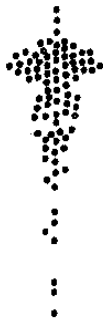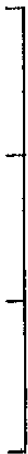

Supplement: MOESM8 [file 9680054]
